# Supplementary material for: Interprofessional education in geriatric medicine: towards best practice. A controlled before–after study of medical and nursing students
Source: PubMed Central journal article supplement — BMJ Open. 2020 Jan 20;10(1):e018041. doi: 10.1136/bmjopen-2017-018041 (PMC7045260; doi:10.1136/bmjopen-2017-018041), 2020-01-20
Supplement: bmjopen-2017-018041supp002.pdf [file bmjopen-2017-018041supp002.pdf]

# Inter-professional Learning Questionnaire (Post)

---

**Thank you for taking part in our trial of inter-professional learning. Please answer all questions honestly. There are no right or wrong answers. If you have any questions please contact**  
Sanja.thompson@ouh.nhs.uk

---

*Please tick the appropriate box below:*

- Medical student  
 Nursing student
- 

**Please indicate the degree to which you agree or disagree with the statement by drawing a circle around the response that best expresses your feeling.**

1. Learning with other students will help me become a more effective member of a health care team

*Strongly disagree*      *Disagree*      *Neutral*      *Agree*      *Strongly agree*

2. Patients would ultimately benefit if health-care students worked together to solve patient problems

*Strongly disagree*      *Disagree*      *Neutral*      *Agree*      *Strongly agree*

3. Shared learning with other health-care students will increase my ability to understand clinical problems

*Strongly disagree*      *Disagree*      *Neutral*      *Agree*      *Strongly agree*

4. Learning with health-care students before qualification would improve relationships after qualification

*Strongly disagree*      *Disagree*      *Neutral*      *Agree*      *Strongly agree*

5. Communication skills should be learned with other health-care students

*Strongly disagree*      *Disagree*      *Neutral*      *Agree*      *Strongly agree*

6. Shared learning will help me to think positively about other professionals

*Strongly disagree*      *Disagree*      *Neutral*      *Agree*      *Strongly agree*

7. For small group learning to work, students need to trust and respect each other

*Strongly disagree*      *Disagree*      *Neutral*      *Agree*      *Strongly agree*

8. Team-working skills are essential for all health care students to learn

*Strongly disagree*      *Disagree*      *Neutral*      *Agree*      *Strongly agree*

9. Shared learning will help me to understand my own limitations

*Strongly disagree*      *Disagree*      *Neutral*      *Agree*      *Strongly agree*

10. I don't want to waste my time learning with other health-care students

*Strongly disagree*      *Disagree*      *Neutral*      *Agree*      *Strongly agree*

11. It is not necessary for undergraduate health-care students to learn together

*Strongly disagree*      *Disagree*      *Neutral*      *Agree*      *Strongly agree*

12. Clinical problem-solving skills can only be learned with students from my own department

*Strongly disagree*      *Disagree*      *Neutral*      *Agree*      *Strongly agree*

13. Shared learning with other health-care students will help me to communicate better with patients and other professionals

*Strongly disagree*      *Disagree*      *Neutral*      *Agree*      *Strongly agree*

14. I would welcome the opportunity to work on small-group projects with other health-care students

*Strongly disagree*      *Disagree*      *Neutral*      *Agree*      *Strongly agree*

15. Shared learning will help to clarify the nature of patient problems

*Strongly disagree*      *Disagree*      *Neutral*      *Agree*      *Strongly agree*

16. Shared learning before qualification will help me become a better team worker

*Strongly disagree*      *Disagree*      *Neutral*      *Agree*      *Strongly agree*

17. The function of nurses is mainly to provide support for doctors

*Strongly disagree*      *Disagree*      *Neutral*      *Agree*      *Strongly agree*

18. I'm not sure what my professional role will be

*Strongly disagree*      *Disagree*      *Neutral*      *Agree*      *Strongly agree*

19. I have to acquire much more knowledge and skills than other health-care students

*Strongly disagree*      *Disagree*      *Neutral*      *Agree*      *Strongly agree*

---

***The following are a number of open ended questions. Please answer as honestly as possible. There are no right or wrong answers. (Please note that first 3 questions are about the "other" profession, not yours)***

1. What is the role of a nurse/doctor in inter-professional team?

2. What expertise does a nurse/doctor bring to inter-professional team?

3. What concerns do you have about learning alongside nursing/medical students?

4. What curricular topics would be best suited to inter-professional learning (nursing and medical students)?

5. How easy did you find it to contribute/voice your opinion? (*Please specify why*)

6. Was this experience what you expected it to be? (*Please specify why/why not*)

7. Would you be happy to take part in this type of learning again? *(Please specify why/why not)*

8. What did you enjoy most about learning with other healthcare students? *(Please specify why)*

9. What did you least enjoy about learning with other healthcare students? *(Please specify why)*

10. What did you learn from engaging in this type of learning with other healthcare students?

11. How has this type of learning affected your understanding of inter-professional collaboration?

12. How has this type of learning impacted your ability to work collaboratively with other professionals?

---

***Thank you for taking the time to complete this questionnaire. If you have any further feedback please contact [Sanja.thompson@ouh.nhs.uk](mailto:Sanja.thompson@ouh.nhs.uk)(Consultant geriatrician, Honorary Senior Clinical Lecturer)***
